# Supplementary material for: Modeling the temporal dynamics of the gut microbial community in adults and infants
Source: PLoS Comput Biol. 2019 Jun 27;15(6):e1006960. doi: 10.1371/journal.pcbi.1006960 (PMC6597035; doi:10.1371/journal.pcbi.1006960)
Supplement: S1 Table — P-values of the Wilcoxon test comparing the prediction accuracy (R2) of MTV-LMM with the prediction accuracy of the AR(1) model, the sVAR model and the ARIMA (1, 0, 0)-Poisson regression model. (CSV) [file pcbi.1006960.s007.csv]

	David et al.	Caporaso et al.	DIABIMMUNE
AR(1)	$< $ 2.2e-16	$1.7e-7$	$1.06e-4$
sVAR	$< 2.2e-16$	$< 2.2e-16$	$< 2.2e-16$
ARIMA Poisson-regression	$< 2.2e-16$	$< 2.2e-16$	$< 2.2e-16$
